# Supplementary material for: Isobenzotriazolophanes: a new class of fluorescent cyclophanes as sensors for aromatic nitro explosives – picric acid
Source: Royal Society of Chemistry journal article supplement (doi:10.1039/c4ra06320a), 2014-09-18
Supplement: c4ra06320a1.pdf [file c4ra06320a1.pdf]

## Supporting Information

### Isobenzotriazolophanes: A new class of fluorescent cyclophanes as sensors for aromatic nitro explosives - picric acid

**Nagarathinam Venkatesan,<sup>a</sup> Vikram Singh,<sup>b</sup> Perumal Rajakumar<sup>\*a</sup> and Ashok kumar Mishra<sup>b</sup>**

<sup>a</sup> *Department of Organic Chemistry, University of Madras, Guindy Campus, Chennai -25, India. Email: [perumalrajakumar@gmail.com](mailto:perumalrajakumar@gmail.com)*

<sup>b</sup> *Department of Chemistry, Indian Institute of Technology Madras, Chennai-36, India. Email: [mishra@iitm.ac.in](mailto:mishra@iitm.ac.in)*

- ES1** General experimental procedures of compound **1(a,b)**, **2(a,b)** and **3(a,b)**.
- ES2** <sup>1</sup>H NMR spectrum of 2-dodecyl benzotriazole
- ES3** <sup>13</sup>CNMR spectrum of 2-dodecyl benzotriazole.
- ES4** <sup>1</sup>H NMR spectrum of **4b**.
- ES5** <sup>13</sup>CNMR spectrum of **4b**.
- ES6** <sup>1</sup>H NMR spectrum of **5b**.
- ES7** <sup>13</sup>CNMR spectrum of **5b**.
- ES8** <sup>1</sup>H NMR spectrum of **6b**.
- ES9** <sup>13</sup>CNMR spectrum of **6b**.
- ES10** <sup>1</sup>H NMR spectrum of **1b**.
- ES11** <sup>13</sup>CNMR spectrum of **1b**.
- ES12** <sup>1</sup>H NMR spectrum of **7a**.
- ES13** <sup>13</sup>CNMR spectrum of **7a**.
- ES14** <sup>1</sup>H NMR spectrum of **8a**.
- ES15** <sup>13</sup>CNMR spectrum of **8a**.
- ES16** <sup>1</sup>H NMR spectrum of **2a**.
- ES17** <sup>13</sup>CNMR spectrum of **2a**.
- ES18** <sup>1</sup>H NMR spectrum of **8b**.
- ES19** <sup>13</sup>CNMR spectrum of **8b**.
- ES20** <sup>1</sup>H NMR spectrum of **2b**.
- ES21** <sup>13</sup>CNMR spectrum of **2b**.
- ES22** <sup>1</sup>H NMR spectrum of **9b**.
- ES23** <sup>13</sup>CNMR spectrum of **9b**.
- ES24** <sup>1</sup>H NMR spectrum of **10b**.
- ES25** <sup>13</sup>CNMR spectrum of **10b**.

- ES26**  $^1\text{H}$  NMR spectrum of **3b**.  
**ES27**  $^{13}\text{C}$  NMR spectrum of **3b**.  
**ES28** Mass spectrum of compound **3b**.  
**ES29** Materials and Methods.  
**ES30** UV-VIS electronic absorption spectra of stilbenecarbazolophane **3b** (A) and PA (B) in cyclohexane.  
**ES31** Emission spectra of stilbenecarbazolophane **3b** (1  $\mu\text{M}$ ) in the absence and presence of the PA (1 mM) in cyclohexane.  
**ES32** UV-VIS electronic absorption (A) and fluorescence emission (B) spectra of Stilbenecarbazolophane **3b** (5  $\mu\text{M}$ ) in cyclohexane [ $\lambda_{\text{ex}} = 380 \text{ nm}$  and  $\lambda_{\text{em}} = 450 \text{ nm}$ ]  
**ES33** UV-VIS electronic spectra of PA (1 mM) in cyclohexane.  
**ES34** (A) UV-VIS electronic absorption (B) fluorescence emission spectra of Stilbenecarbazolophane **3b** (5  $\mu\text{M}$ ) in cyclohexane in the presence of different concentration (100  $\mu\text{M}$  - 800  $\mu\text{M}$ ) of PA.  
**ES35** A calibration plot, fluorescence intensity of Stilbenecarbazolophane **3b** – PA against the concentration of PA in cyclohexane. [ $\lambda_{\text{ex}} = 405 \text{ nm}$  &  $\lambda_{\text{ex}} = 450 \text{ nm}$ ]  
**ES36** Stern-Volmer plot in response to PA.  
**ES37** Extent of fluorescence quenching of carbazoloisobenzotriazolophane **3b** with nitro aromatics.

## **ES1**

### **General procedure for synthesis of precyclophane by *N*-arylation of pyrrole/indole/carbazole**

To a mixture of CuI (2.26 mmol),  $\text{K}_3\text{PO}_4$  (28.3 mmol), trans-1,2-diaminocyclohexane (4.53 mmol) and indole (11.20 mmol) in toluene (150 mL) were added aryl dibromide (5.66 mmol) under nitrogen atmosphere. The reaction mixture was refluxed at 110  $^\circ\text{C}$  for 24 h. After the reaction was completed, the solvent was removed under reduced pressure and the residue was extracted with  $\text{CHCl}_3$  (3 x 100 mL), washed with water (2 x 100 mL), brine (150 mL) and dried over anhydrous  $\text{Na}_2\text{SO}_4$ . The solvent was removed and crude product was purified by column chromatography on silica gel using  $\text{CHCl}_3$ /Hexane (1:4, v/v) as eluent.

### **General procedure for synthesis of pyrrole/indole dialdehyde**

To a stirred solution of dimethylformamide (19.9 mmol) at 0  $^\circ\text{C}$ , added phosphorous oxychloride (5.0 mmol) drop wise under nitrogen atmosphere. Bis-indole (2.3 mmol) in dimethylformamide (5.9 mmol) was then added to the reaction mixture at 0  $^\circ\text{C}$  and raised the temperature to 10  $^\circ\text{C}$ . After the completion of addition, the reaction mixture was allow to attain room temperature and then stirred for additional one hour at 35  $^\circ\text{C}$ . The reaction was then

quenched by adding crushed ice (100 g) and further water (100 ml). Then the reaction mixture was then treated thrice with NaOH solution (1 M). The reaction mixture was heated after adding one portion of NaOH solution and the rest of the two portions were added later with stirring. The reaction mixture was then kept in refrigerator overnight. The precipitate obtained was collected by filtration and then dissolved in chloroform (2 x 100 mL). The organic layer was washed with water (100 mL) and then dried over Na<sub>2</sub>SO<sub>4</sub>, filtered and solvent was evaporated under reduced pressure to give the residue which was then chromatographed over SiO<sub>2</sub> using chloroform/methanol (99:1) as eluting solvent to give the corresponding dialdehyde.

#### **General procedure for synthesis of carbazole dialdehyde**

To DMF (61.7 mmol) at 0 °C, phosphorous oxychloride (61.7 mmol) was added drop wise under nitrogen atmosphere. The solution was allowed to warm to room temperature, and then bis-carbazole (3.1 mmol) and 1,2-dichloroethane (DCE) (40 mL) were added. The reaction mixture was heated at 90 °C and kept at that temperature for 2 days. It was poured into water and extracted with CHCl<sub>3</sub> (2 x 100 mL). The chloroform extract was washed with water (2 x 100 mL) and solvent was removed under reduced pressure. The residue was purified by column chromatography using CHCl<sub>3</sub> (100%) as an eluent to give corresponding dialdehyde as a colourless solid.

#### **General procedure for McMurray coupling (Procedure D)**

A solution of low valent titanium prepared from TiCl<sub>4</sub> (20 equiv.) with zinc (40 equiv.) and two drops of pyridine in dry THF (200 mL) under nitrogen atmosphere at 0 °C and was allowed to attain room temperature after 0.5 h and then refluxed for 1 h. Dialdehyde (1 equiv.) was added in one batch to the freshly prepared low valent titanium. After the addition was over the reaction mixture was refluxed overnight. The reaction mixture was then cooled and quenched with saturated K<sub>2</sub>CO<sub>3</sub> solution (50 mL). The precipitated inorganic material was removed by filtration. The precipitate was thoroughly washed with THF (2 x 100 mL) for several times and the combined THF extract on evaporation under reduced pressure gave the residue, which was extracted with CHCl<sub>3</sub> (100 mL), washed with water (2 x 100 mL) brine (100 mL) and dried over anhydrous Na<sub>2</sub>SO<sub>4</sub>. Crude product obtained after evaporation of CHCl<sub>3</sub>, was purified by column chromatography using CHCl<sub>3</sub>/Hexane (1:4, v/v) as eluent.

ES2

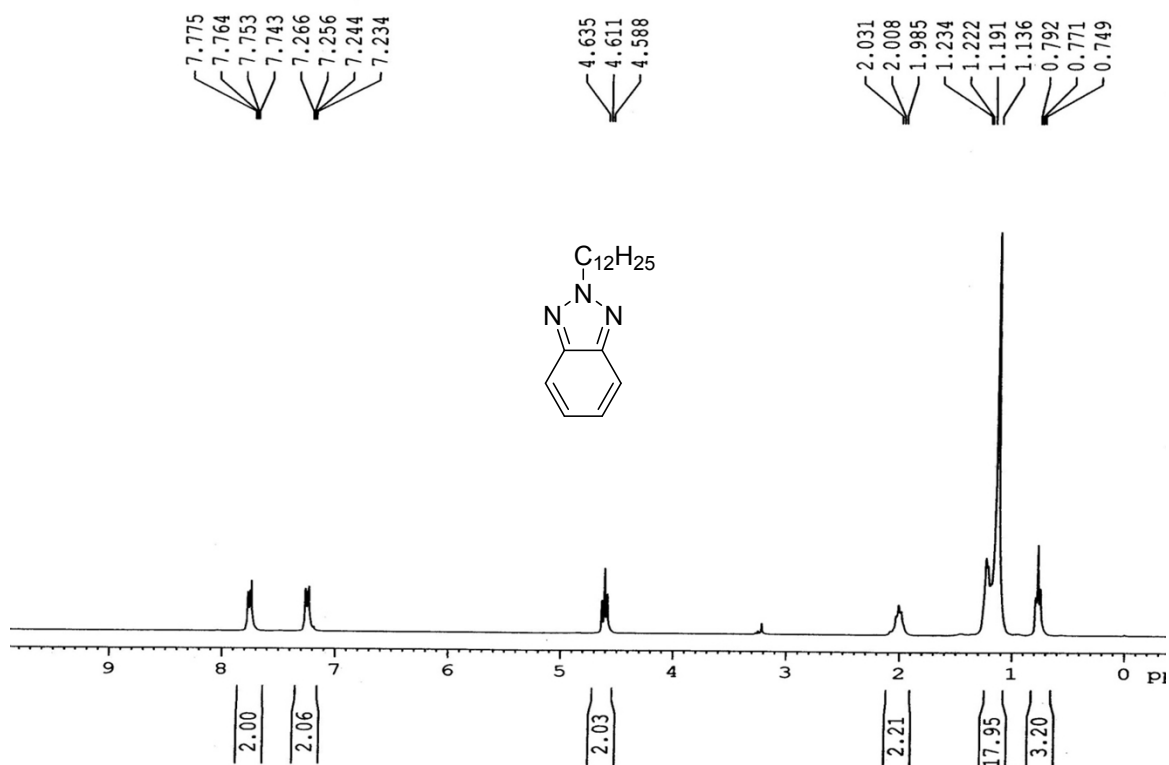

<sup>1</sup>H NMR spectrum (300 MHz, CDCl<sub>3</sub>) of 2-dodecyl benzotriazole

ES3

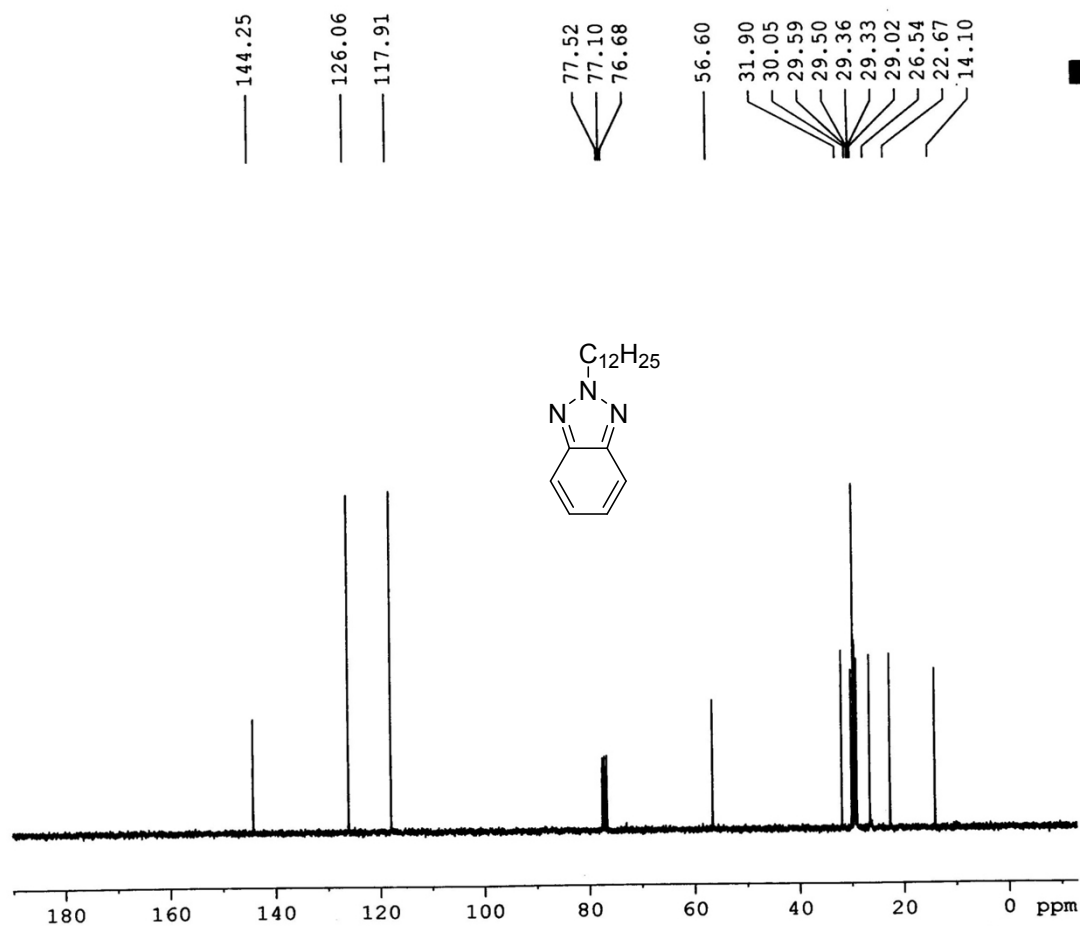

$^{13}\text{C}$  NMR spectrum (75 MHz,  $\text{CDCl}_3$ ) of 2-dodecyl benzotriazole

ES4

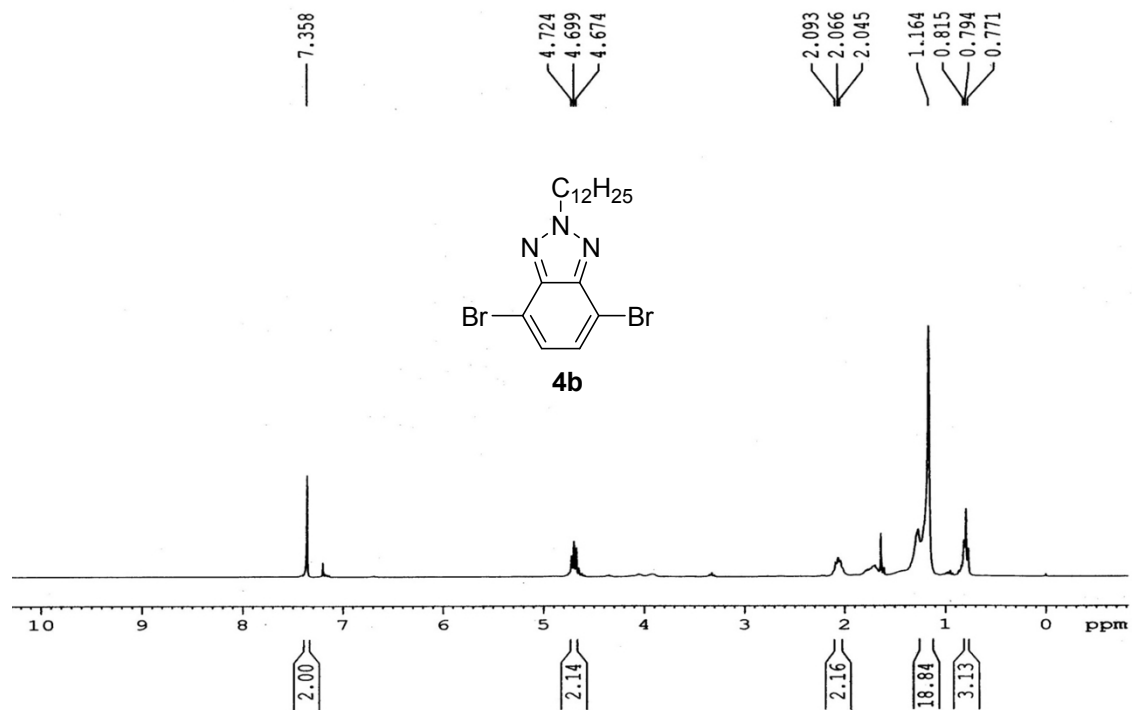

<sup>1</sup>H NMR spectrum (300 MHz, CDCl<sub>3</sub>) of compound **4b**

ES5

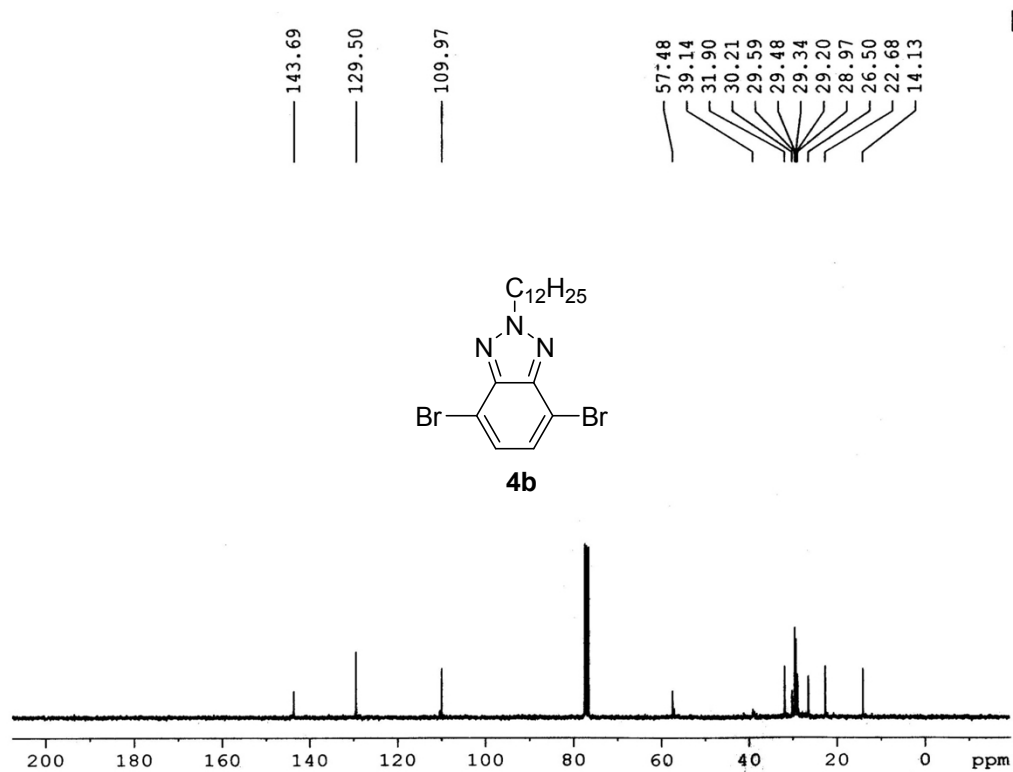

$^{13}\text{C}$  NMR spectrum (75 MHz,  $\text{CDCl}_3$ ) of compound 4b

ES6

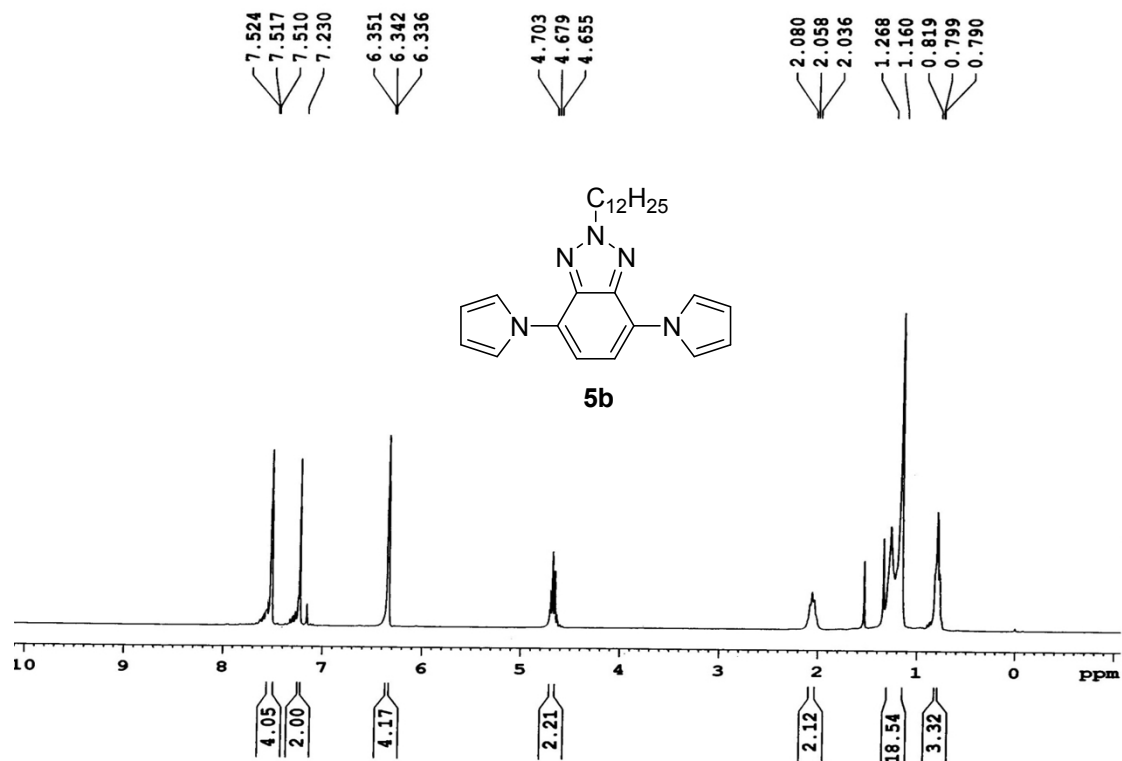

<sup>1</sup>H NMR spectrum (300 MHz, CDCl<sub>3</sub>) of compound 5b



ES7

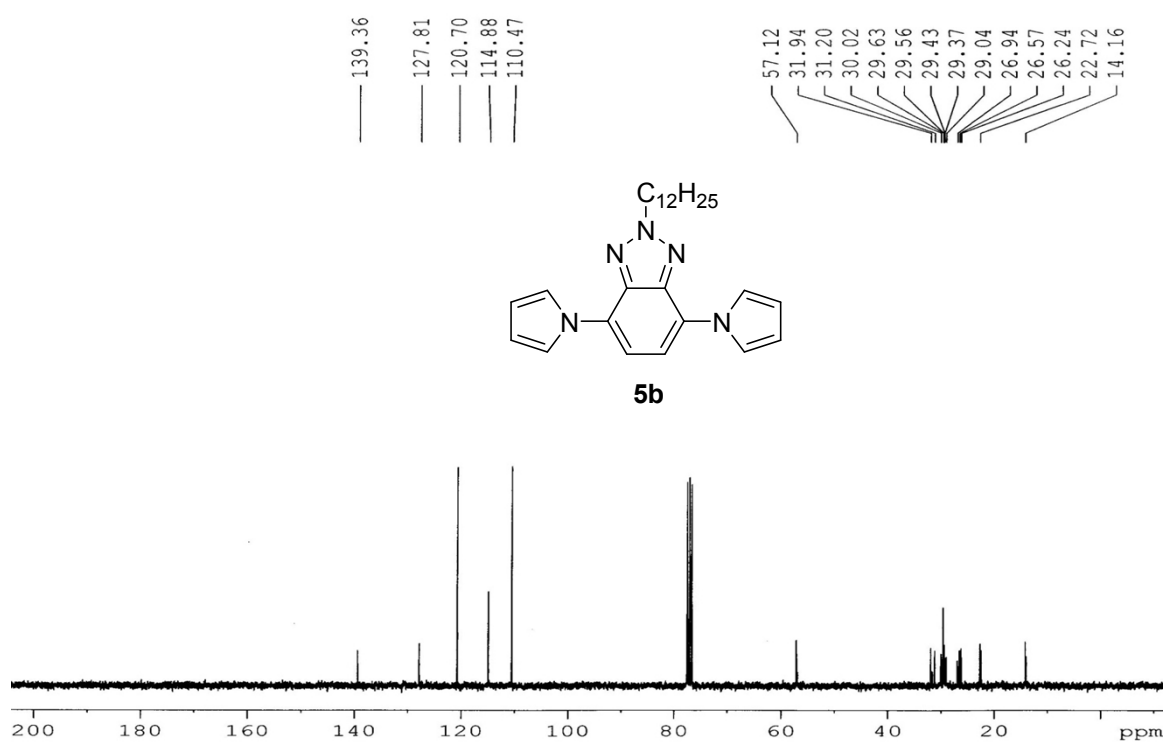

$^{13}\text{C}$  NMR spectrum (75 MHz,  $\text{CDCl}_3$ ) of compound **5b**

ES8

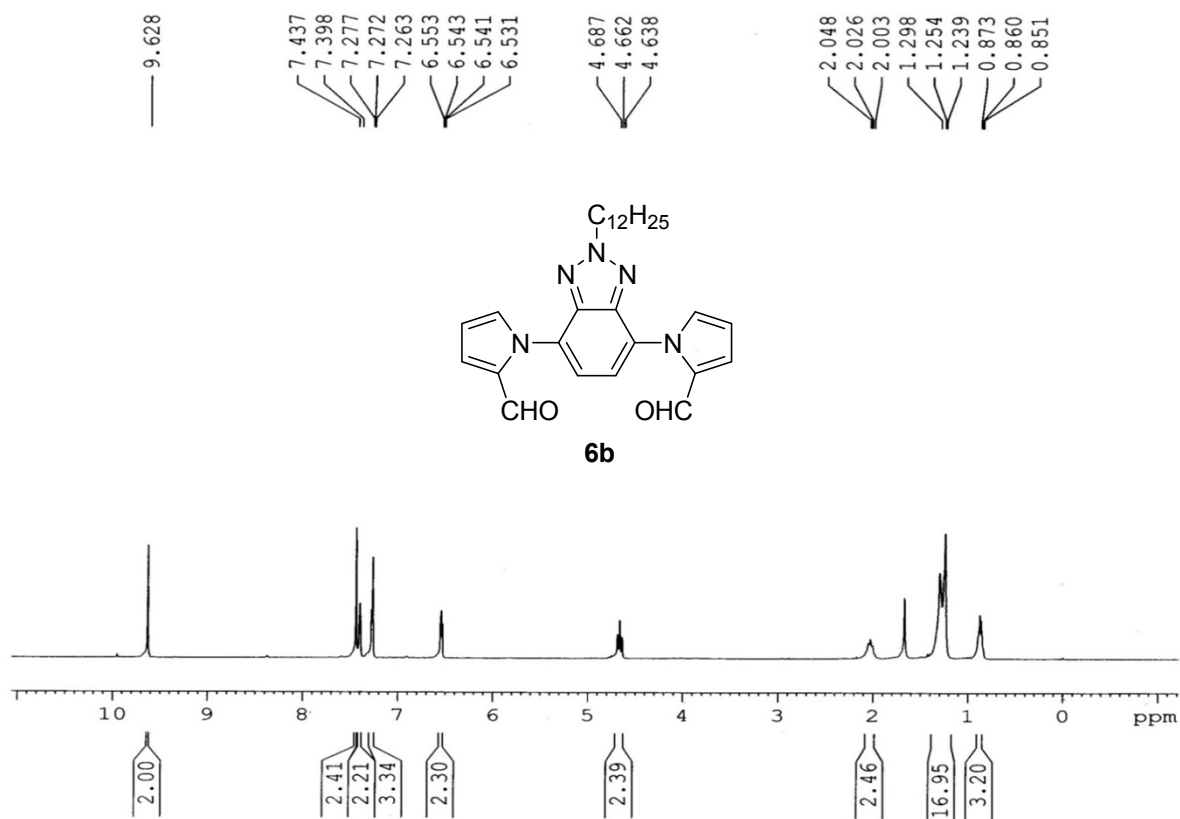

**<sup>1</sup>H NMR spectrum (300 MHz, CDCl<sub>3</sub>) of compound 6b**

ES9

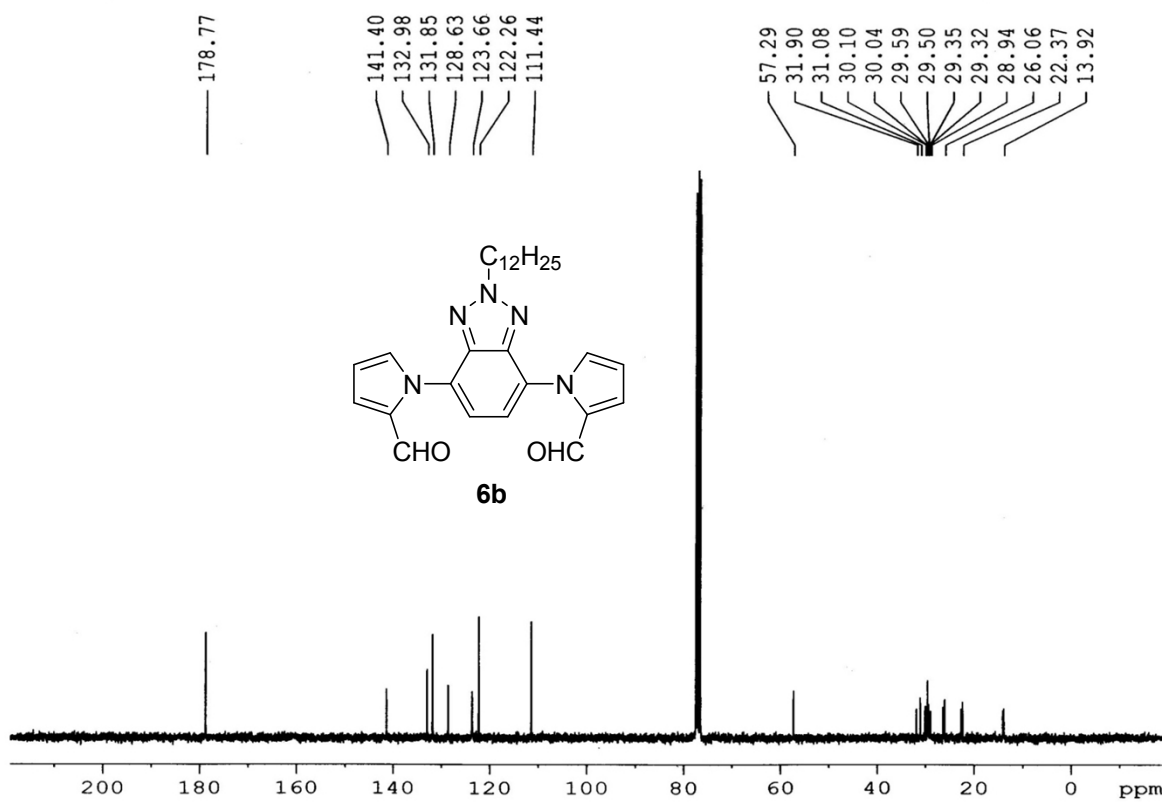

<sup>13</sup>C NMR spectrum (75 MHz, CDCl<sub>3</sub>) of compound **6b**

ES10

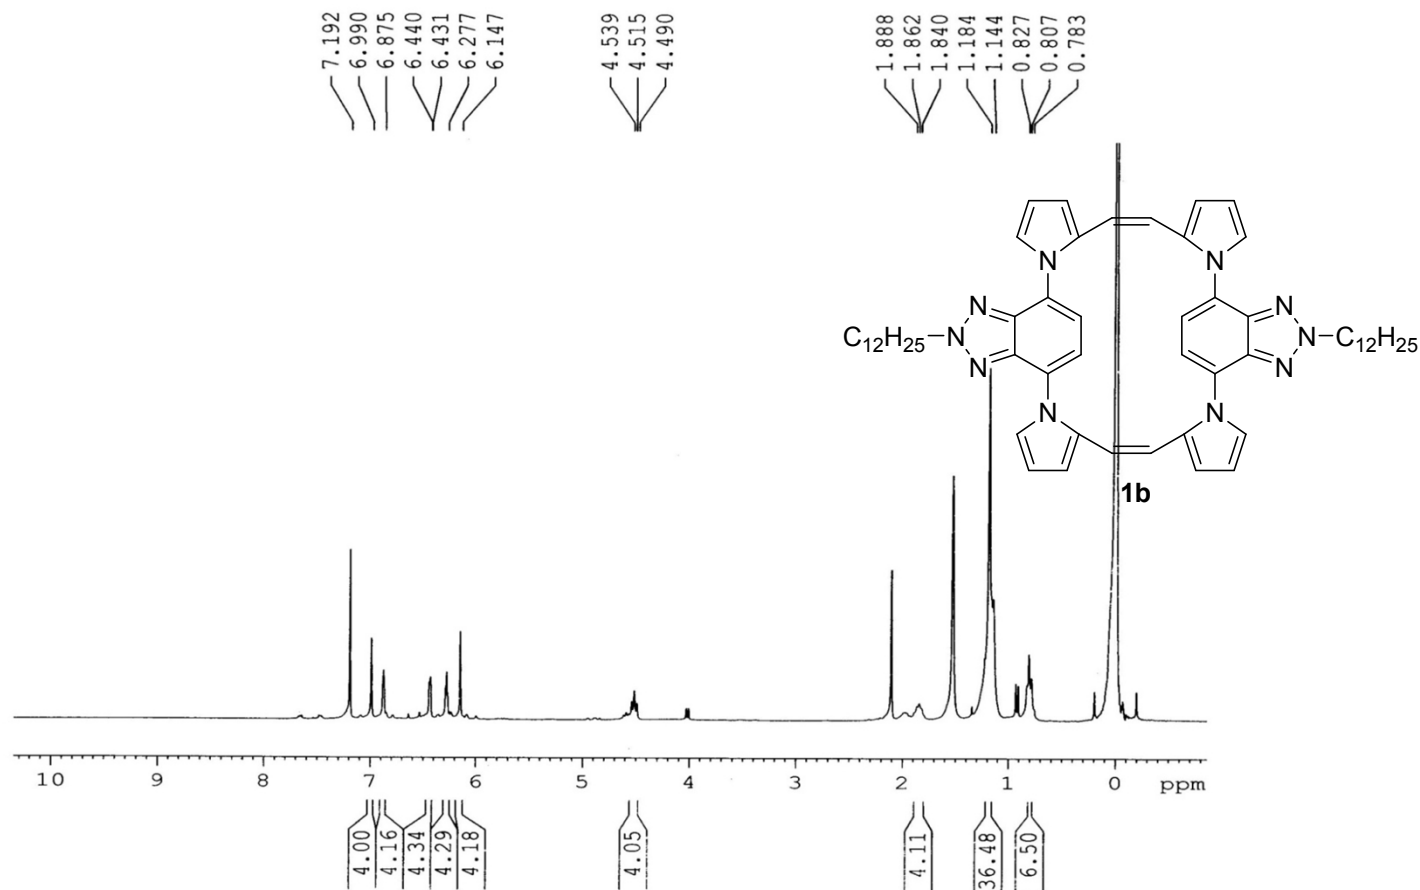

**<sup>1</sup>H NMR spectrum (300 MHz, CDCl<sub>3</sub>) of compound 1b**

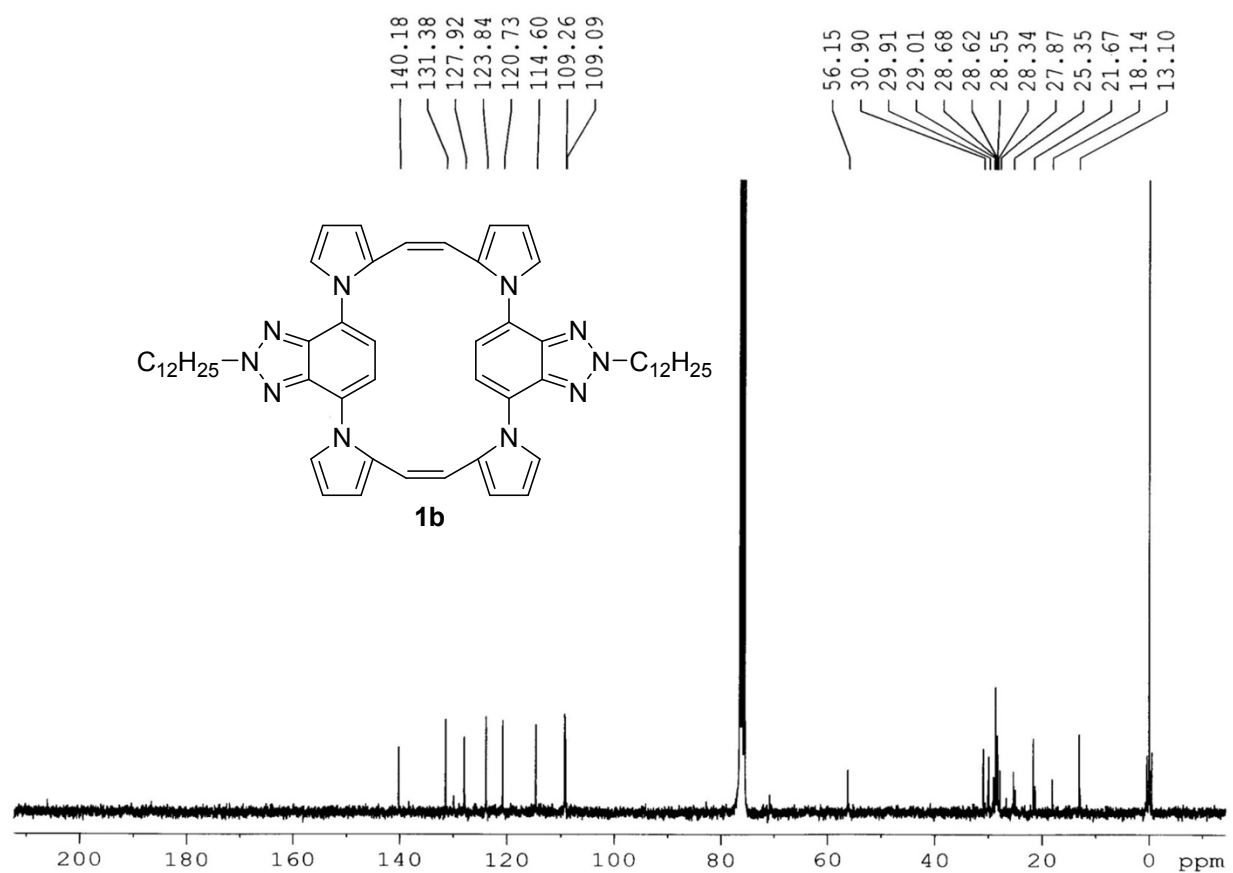

$^{13}\text{C}$  NMR spectrum (75 MHz,  $\text{CDCl}_3$ ) of compound **1b**

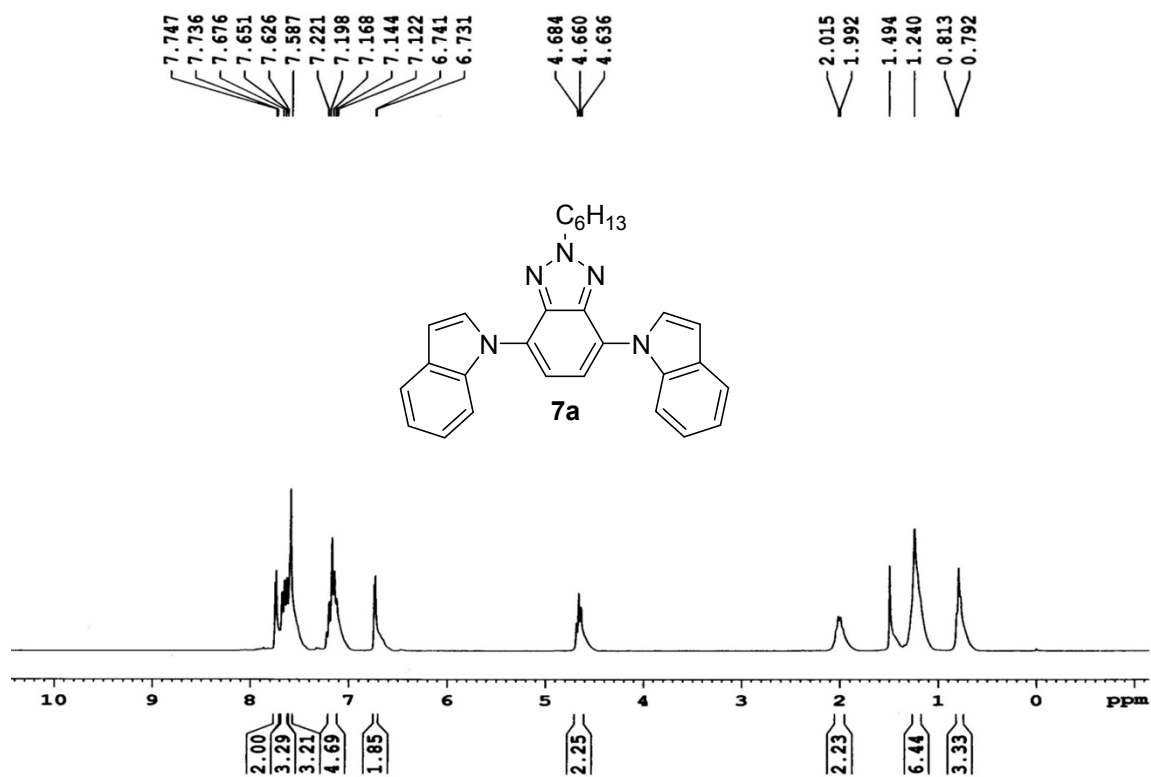

<sup>1</sup>H NMR spectrum (300 MHz, CDCl<sub>3</sub>) of compound **7a**

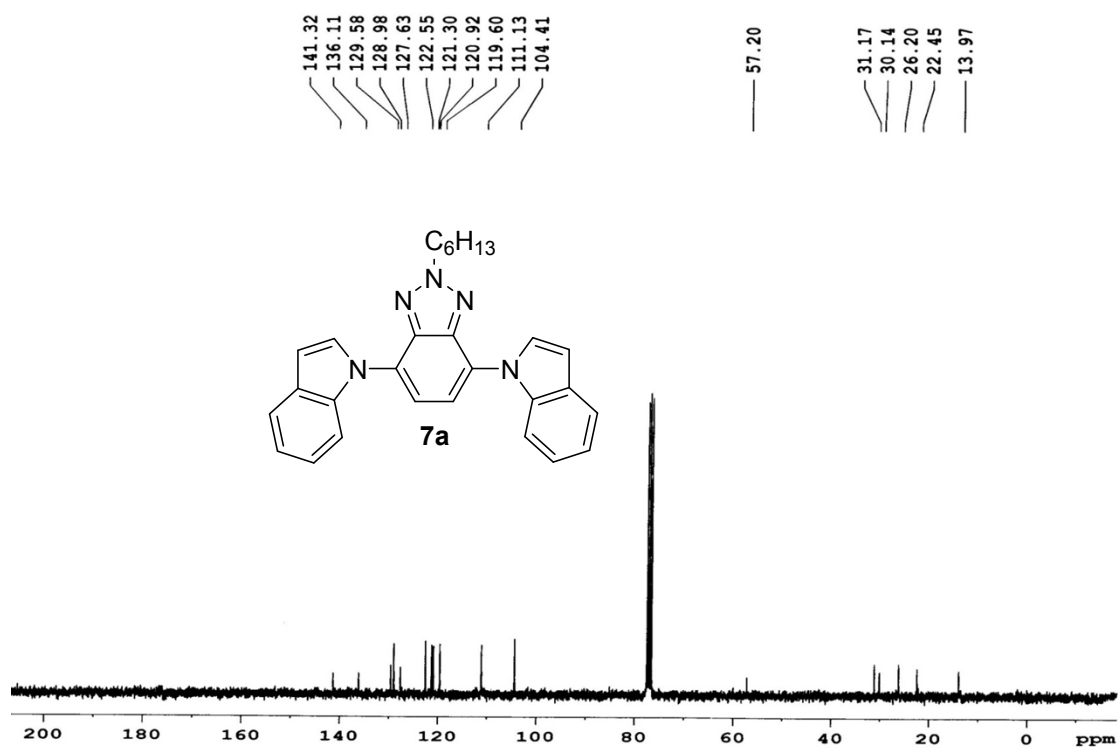

$^{13}\text{C}$  NMR spectrum (75 MHz,  $\text{CDCl}_3$ ) of compound **7a**

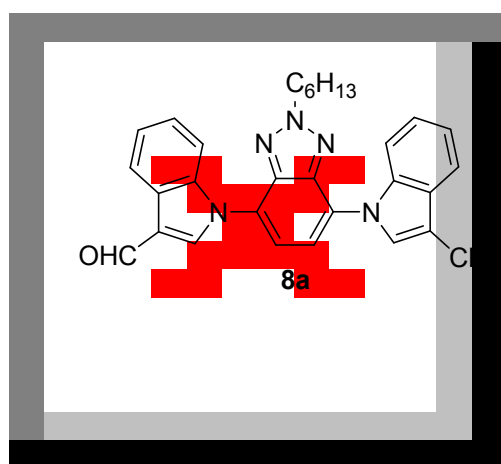

$^1\text{H}$  NMR spectrum (300 MHz,  $\text{CDCl}_3$ ) of compound 8a



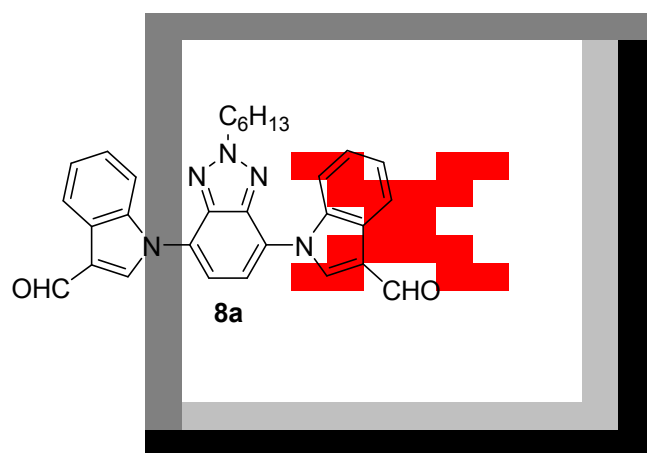

$^{13}\text{C}$  NMR spectrum (75 MHz,  $\text{CDCl}_3$ ) of compound **8a**

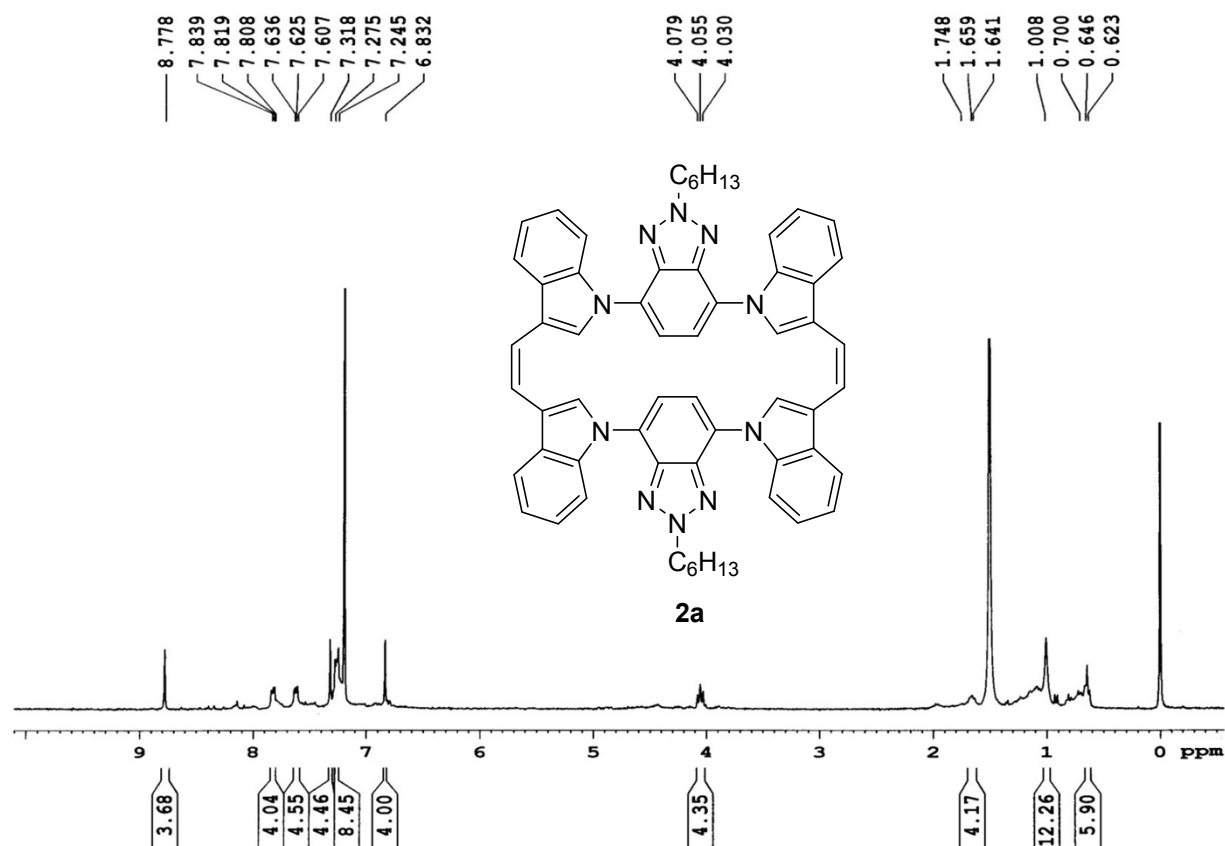

$^1\text{H}$  NMR spectrum (300 MHz,  $\text{CDCl}_3$ ) of compound **2a**

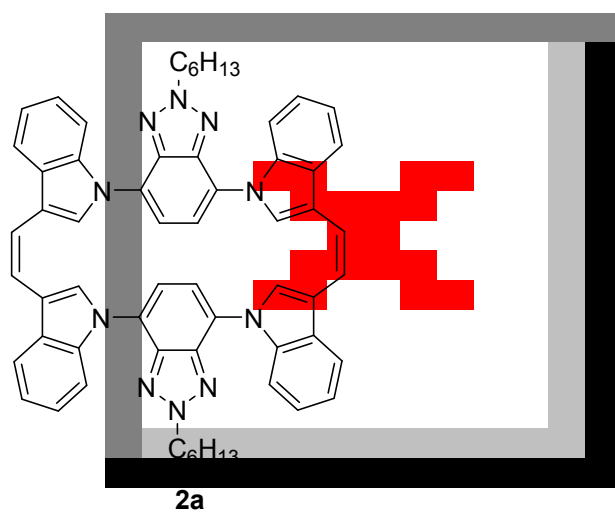

$^{13}\text{C}$  NMR spectrum (75 MHz,  $\text{CDCl}_3$ ) of compound 2a

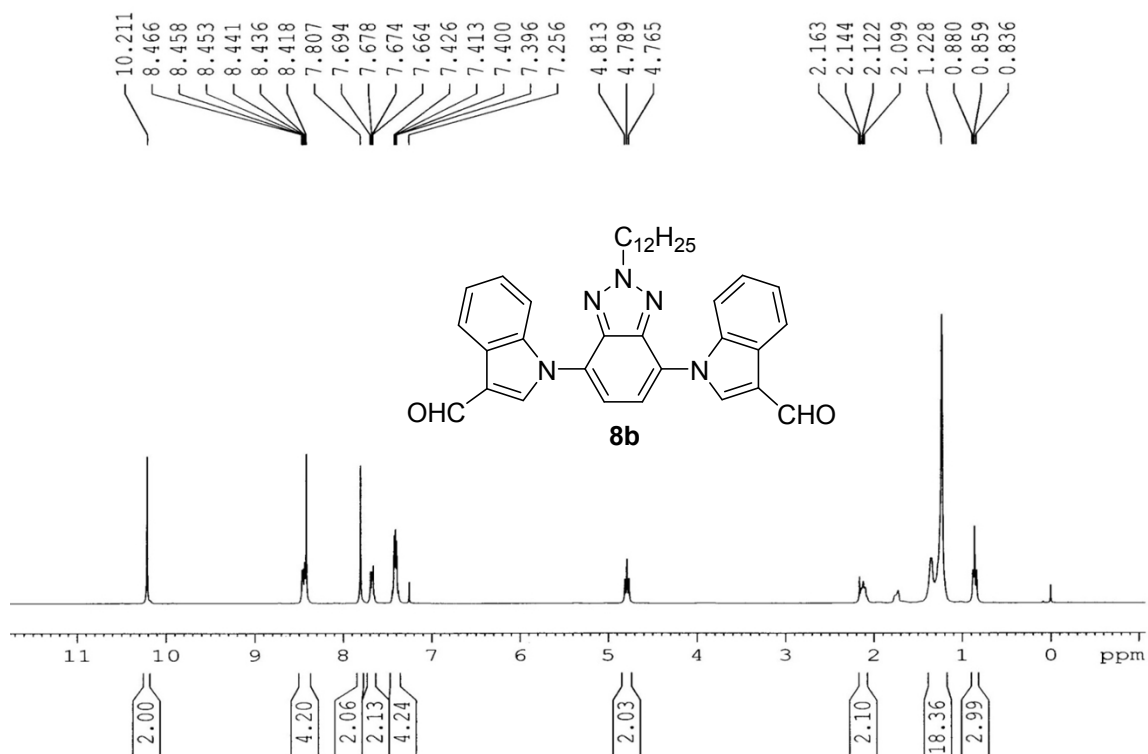

$^1\text{H}$  NMR spectrum (300 MHz,  $\text{CDCl}_3$ ) of compound **8b**

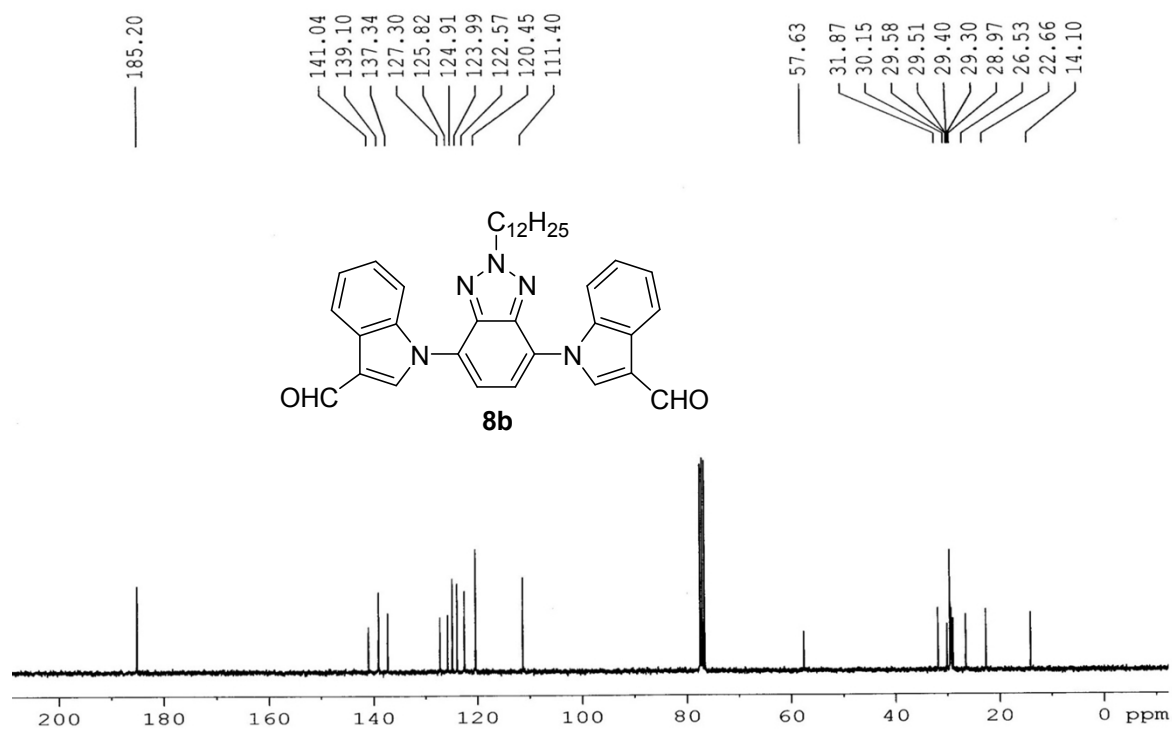

**$^{13}C$  NMR spectrum (75 MHz,  $CDCl_3$ ) of compound **8b****

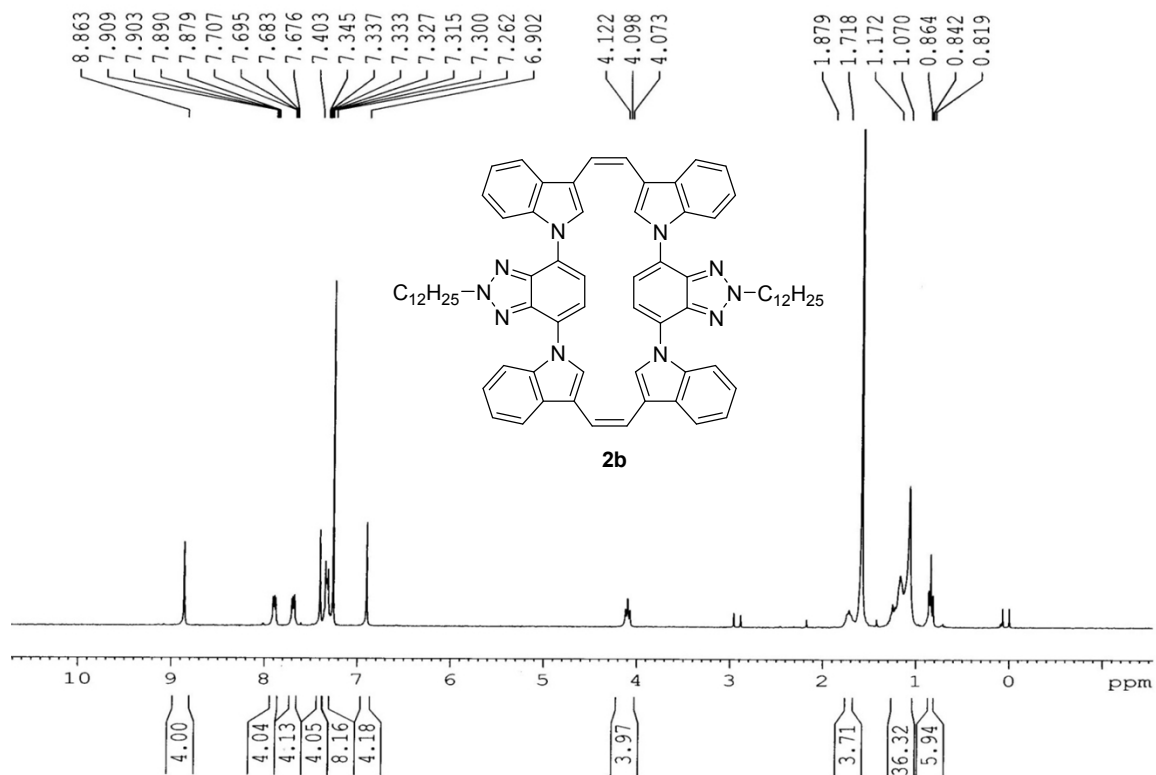

**<sup>1</sup>H NMR spectrum (300 MHz, CDCl<sub>3</sub>) of compound 2b**

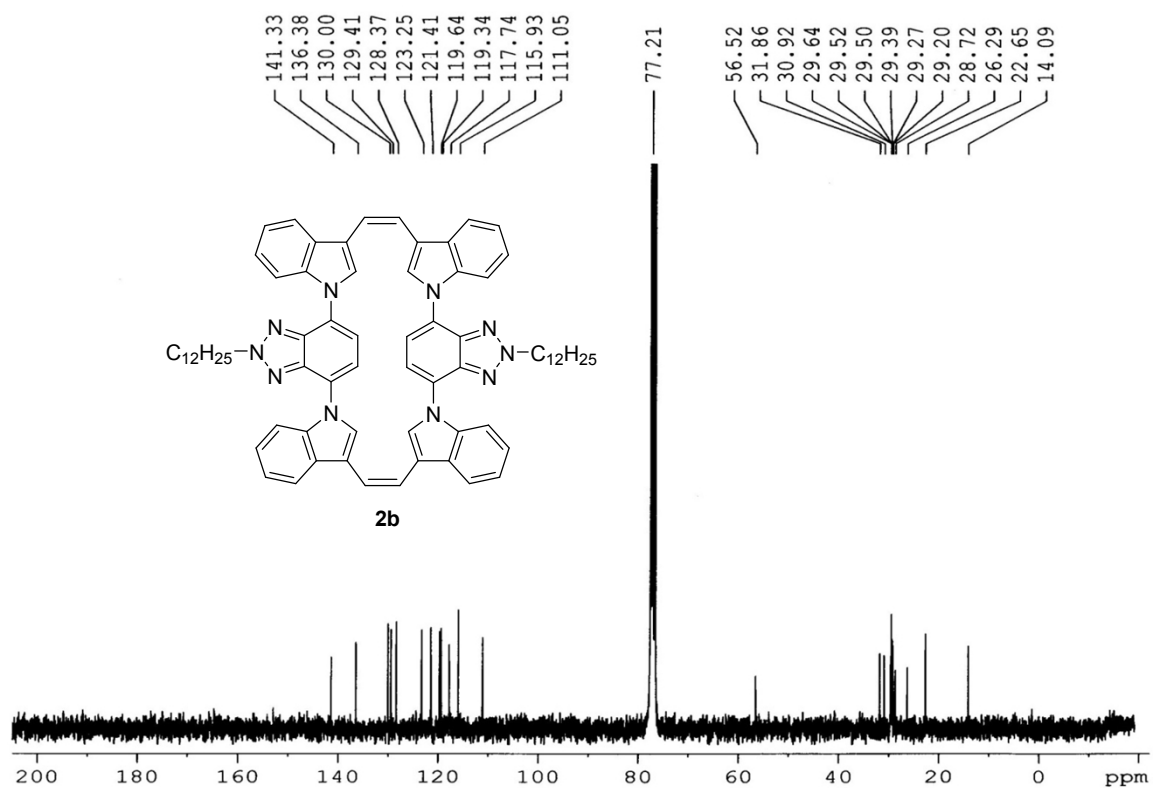

**<sup>13</sup>C NMR spectrum (75 MHz, CDCl<sub>3</sub>) of compound 2b**

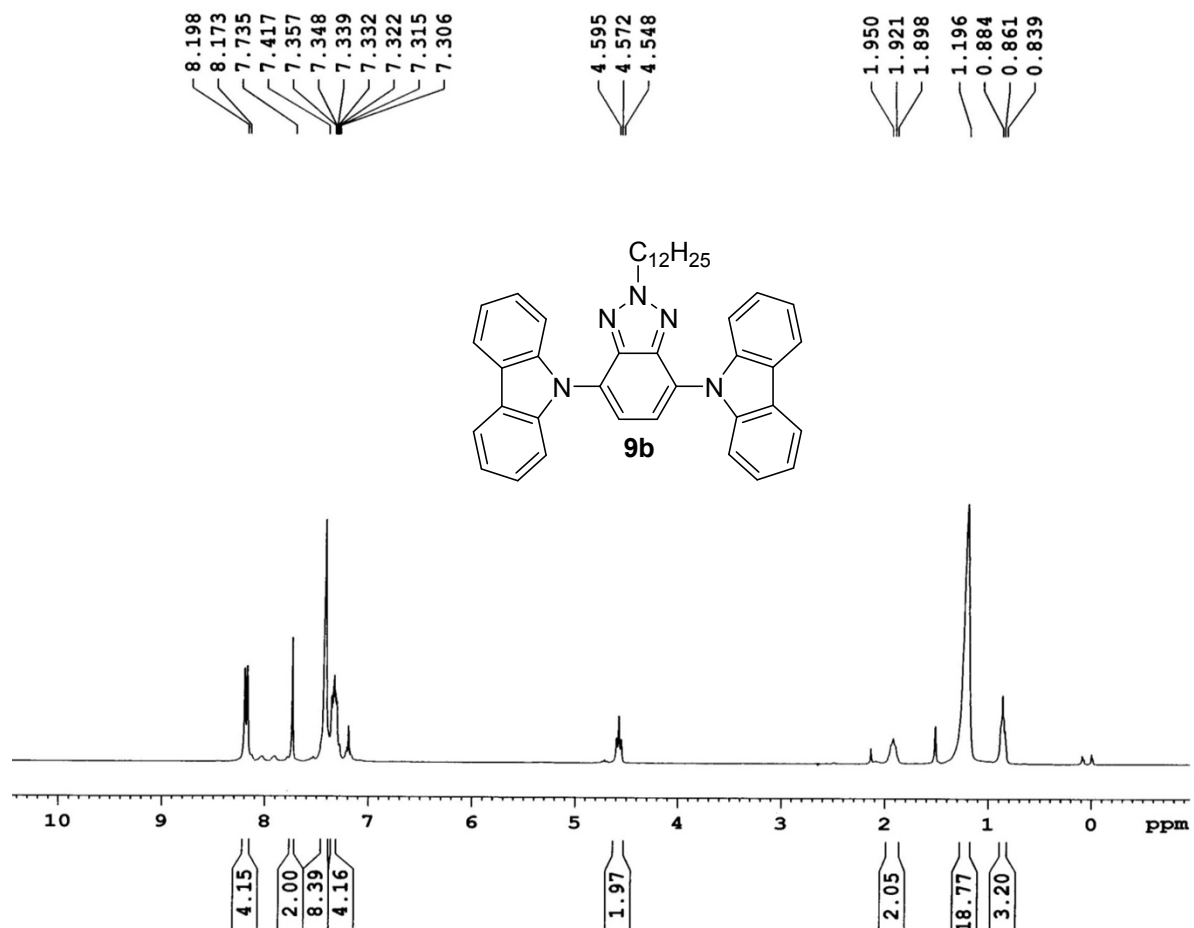

<sup>1</sup>H NMR spectrum (300 MHz, CDCl<sub>3</sub>) of compound **9b**



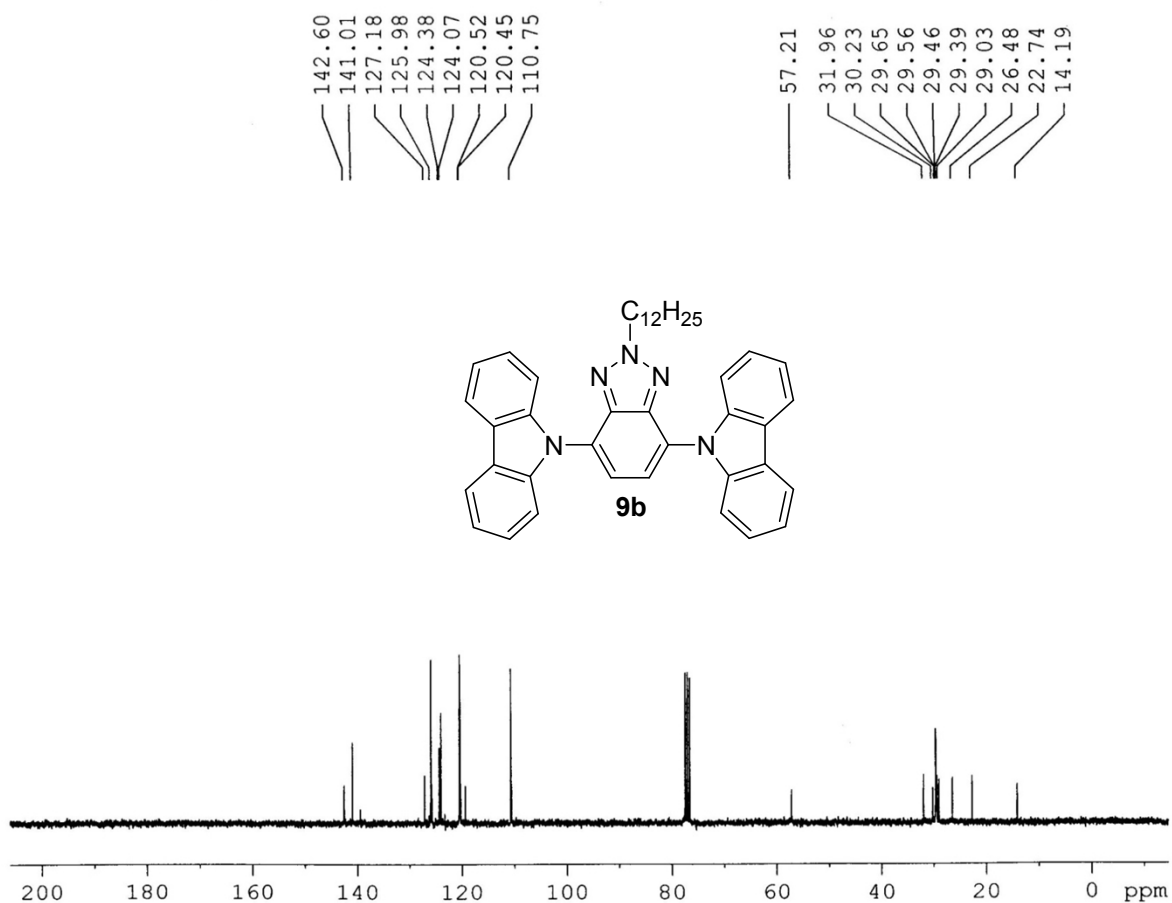

<sup>13</sup>C NMR spectrum (75 MHz, CDCl<sub>3</sub>) of compound **9b**

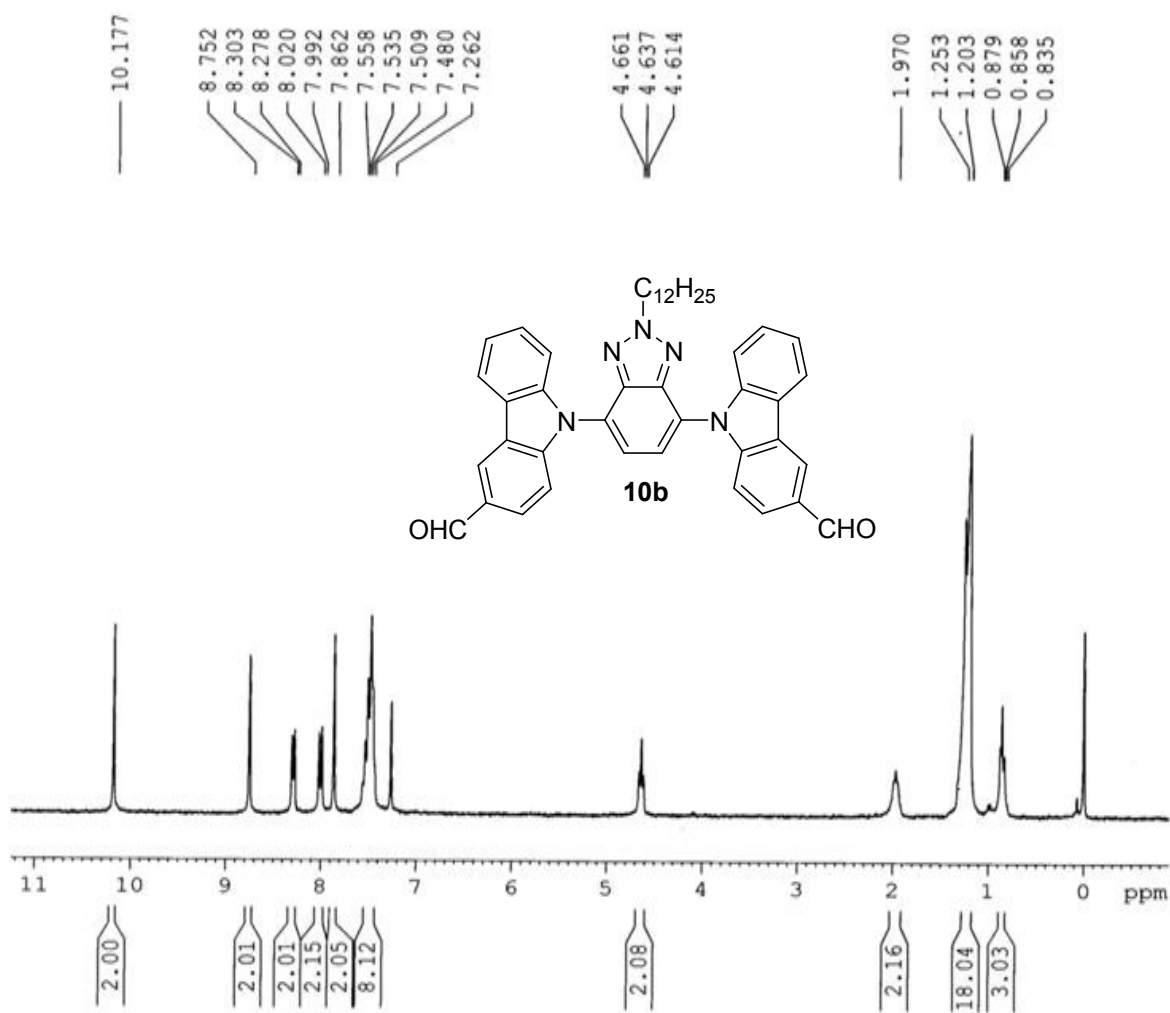

$^1\text{H}$  NMR spectrum (300 MHz,  $\text{CDCl}_3$ ) of compound **10b**

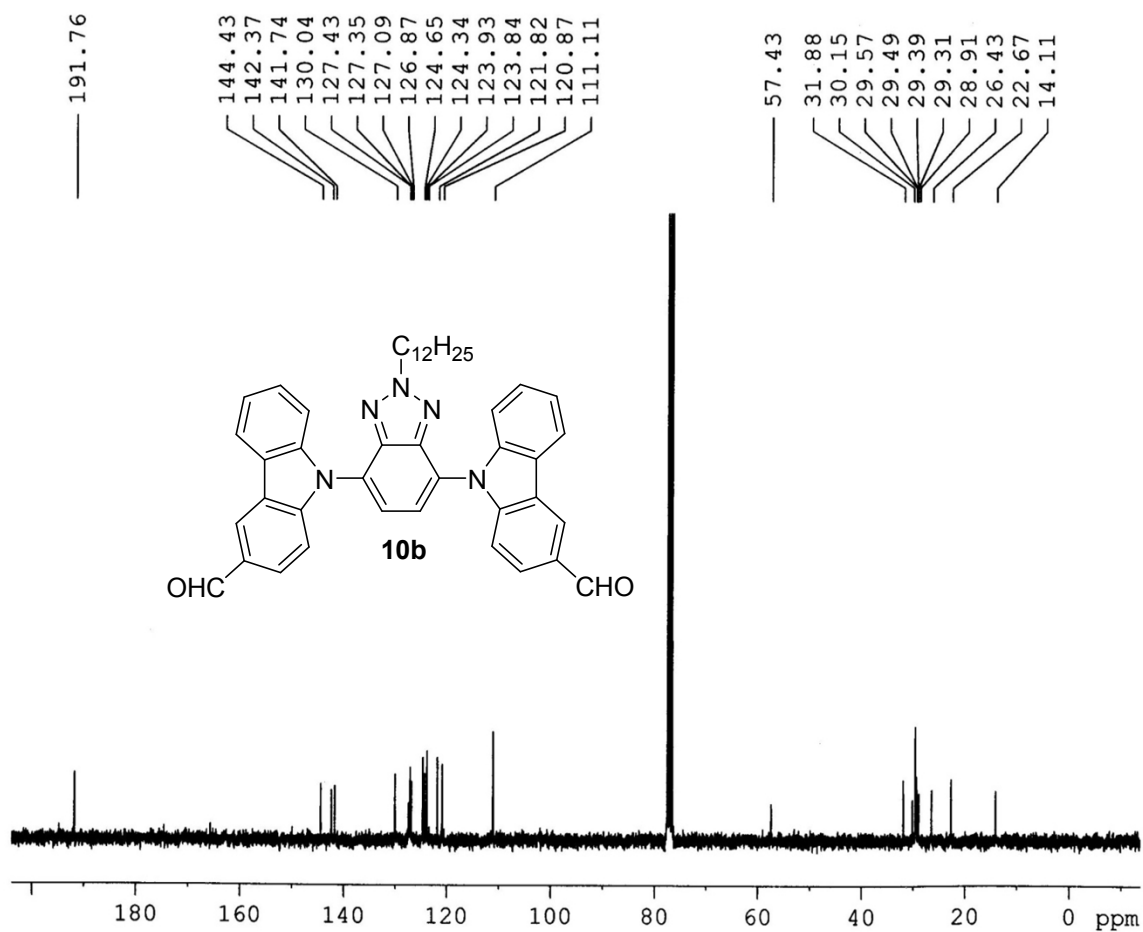

<sup>13</sup>C NMR spectrum (75 MHz, CDCl<sub>3</sub>) of compound **10b**



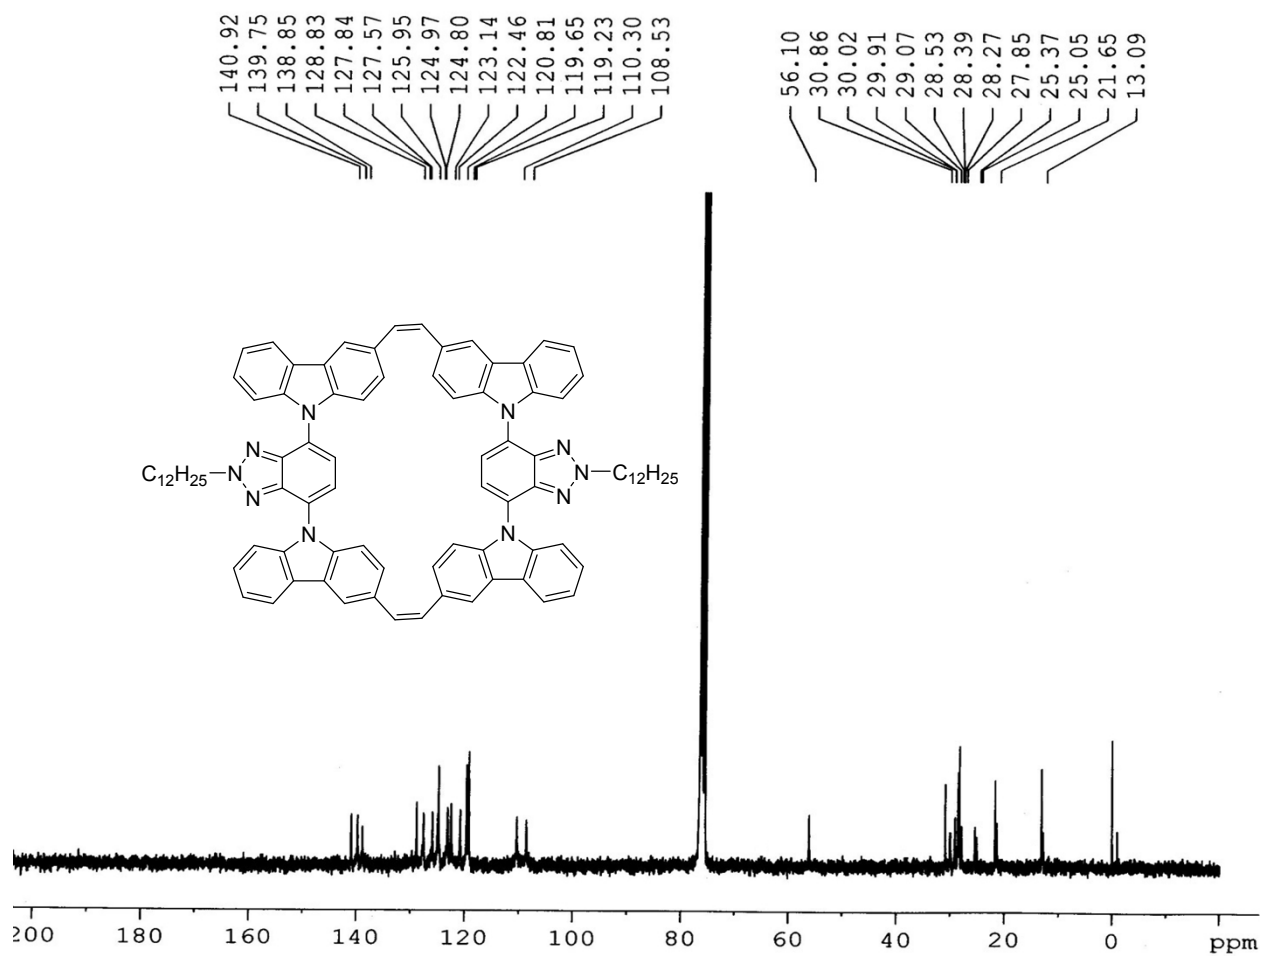

$^{13}C$  NMR spectrum (75 MHz,  $CDCl_3$ ) of compound 3b

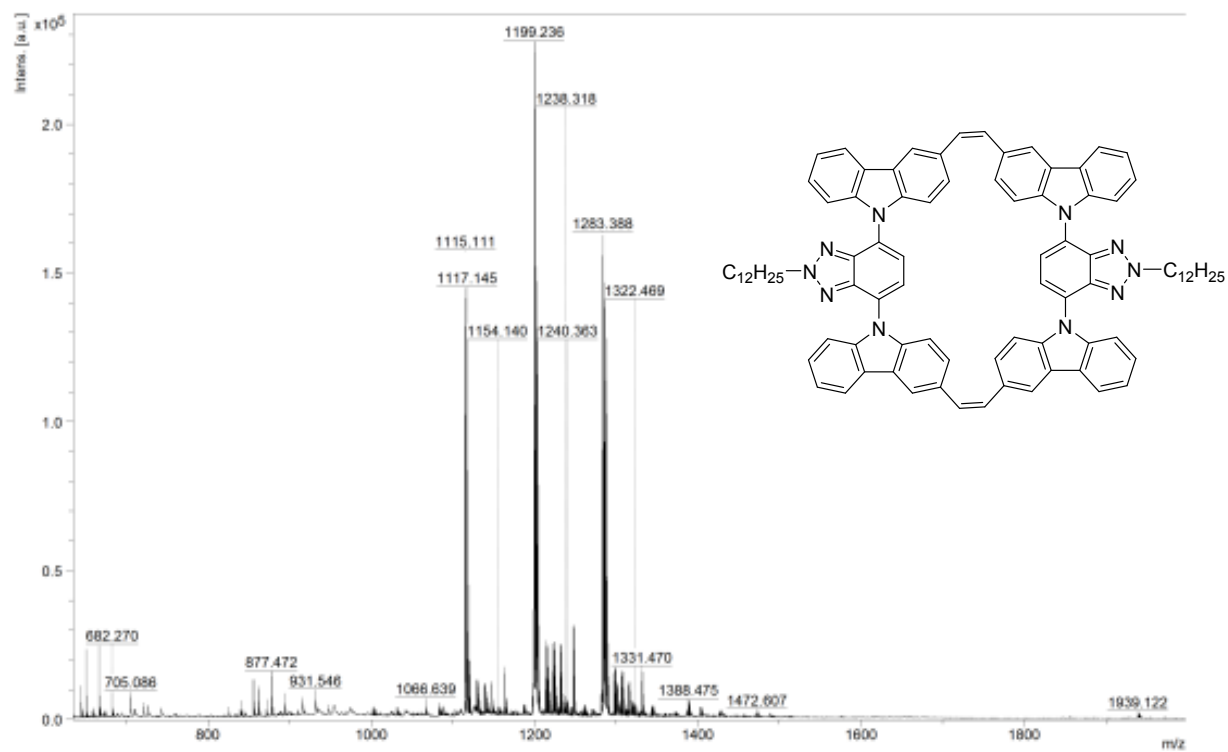

MALDI-TOF Mass spectra of compound **3b**

ES29

Materials and Methods:

### Materials:

Picric acid (PA) was purchased from Sigma-Aldrich chemical and used as a fluorescence quencher. Samples were made in spectral grade solvent cyclohexane purchased from SRL co.

### Instruments:

Fluorescence emission spectra of the samples were measured using Fluoromax-4 (Horiba Jobin Yvon) spectrofluorometer, with a xenon lamp of 150 W as excitation source. Excitation and emission monochromator bandpasses were kept at 2 nm. UV-VIS electronic absorption spectra measurements were carried out in a Jasco V-650 UV-Visible Spectrophotometer with a scan rate of 1000 nm s<sup>-1</sup>.

### Sample preparation:

A stock solution of non-polar stilbenecarbazolophane **3b** was made in cyclohexane (1 mM). The concentration of sensor molecule, stilbenecarbazolophane **3b** was optimized using fluorescence spectroscopic technique as 5  $\mu$ M to sense PA. PA of different concentrations ( $10^{-4}$  M,  $2 \times 10^{-4}$  M,  $4 \times 10^{-4}$  M,  $5 \times 10^{-4}$  M,  $6 \times 10^{-6}$  M, and  $8 \times 10^{-4}$  M) was also made in cyclohexane.

### ES30

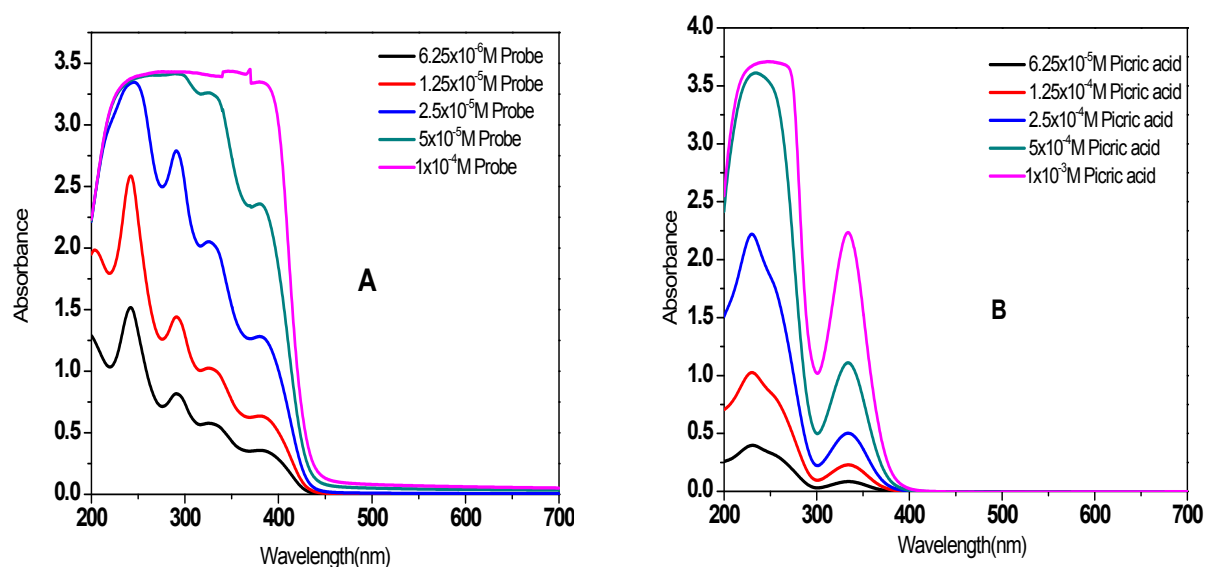

UV-VIS electronic absorption spectra of stilbenecarbazolophane **3b** (A) and PA (B) in cyclohexane

### ES31

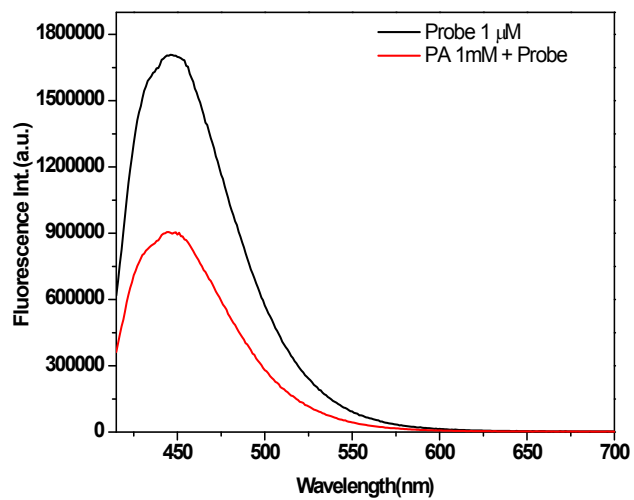

Emission spectra of stilbenecarbazolophane **3b** (1  $\mu\text{M}$ ) in the absence and presence of PA (1 mM) in cyclohexane



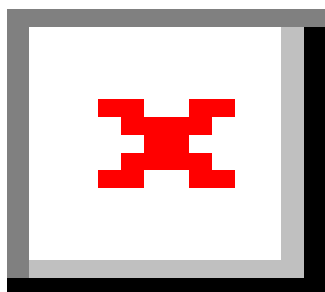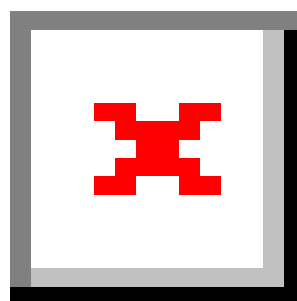

**ES32** UV-VIS electronic absorption (A) and fluorescence emission (B) spectra of stilbenecarbazolophane **3b** (5  $\mu\text{M}$ ) in cyclohexane [ $\lambda_{\text{ex}}$  = 380 nm and  $\lambda_{\text{em}}$  = 450 nm]

**ES33**

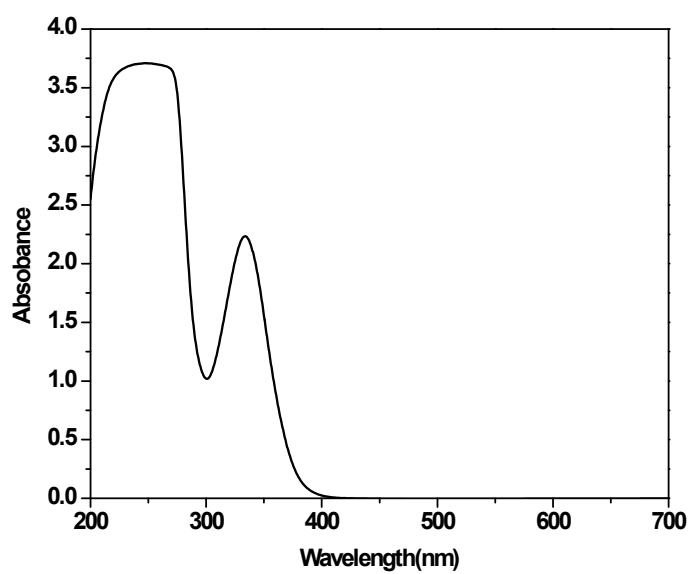

**ES33** UV-VIS electronic spectra of PA (1 mM) in cyclohexane

ES34

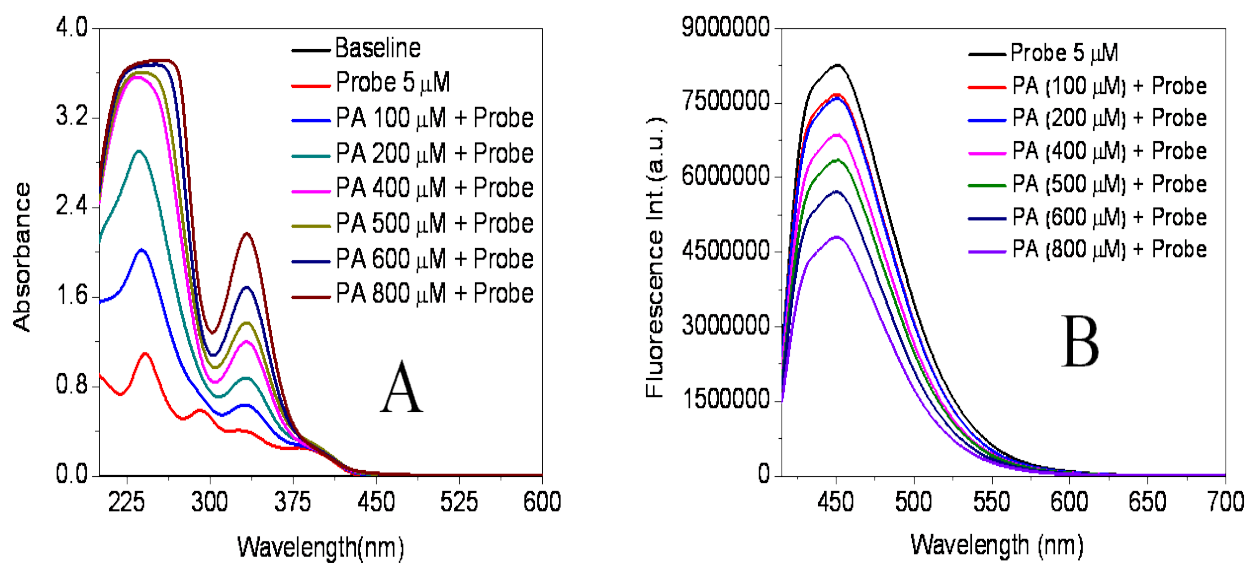

**ES34** (A) UV-VIS electronic absorption (B) fluorescence emission spectra of carbazoloisobenzotriazolophane **3b** (5  $\mu\text{M}$ ) in cyclohexane at different concentration (100  $\mu\text{M}$  - 800  $\mu\text{M}$ ) of PA.

ES35

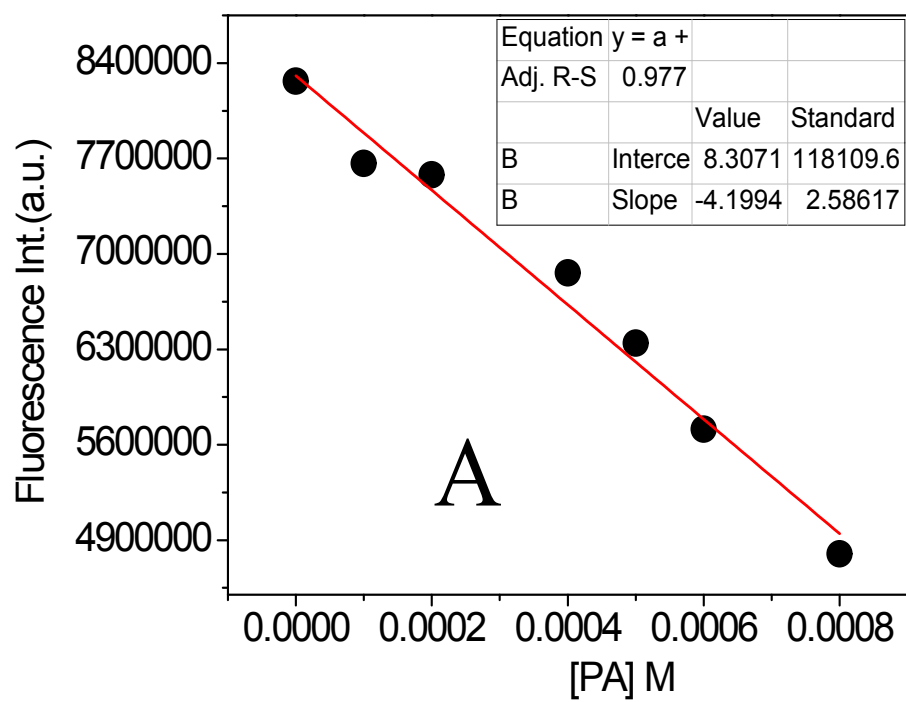

**ES35** A calibration plot, fluorescence intensity of Stilbenecarbazolophane **3b** – PA against the concentration of PA in cyclohexane. [ $\lambda_{\text{ex}} = 405 \text{ nm}$  &  $\lambda_{\text{em}} = 450 \text{ nm}$ ]

**ES36**

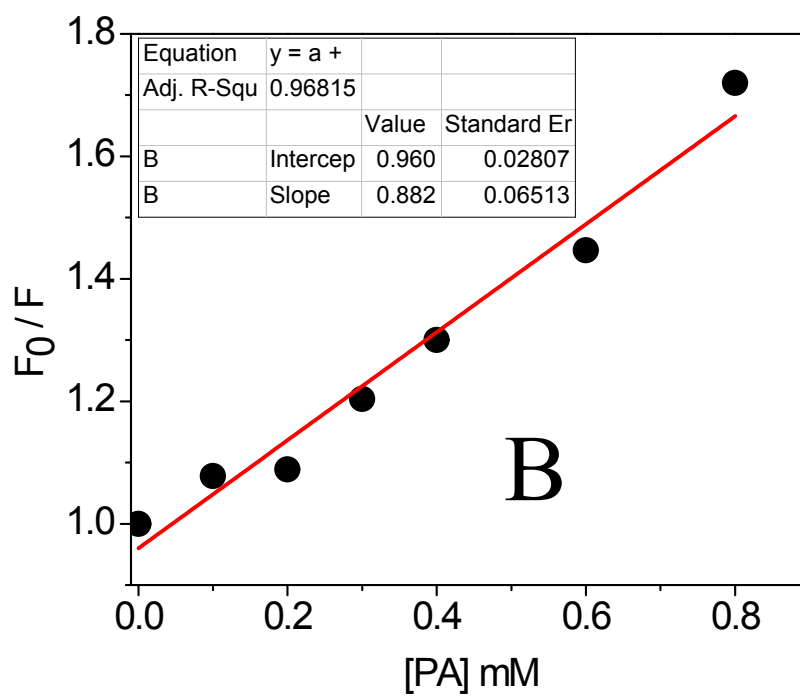

**ES36** Stern-Volmer plot in response to PA

**ES37**

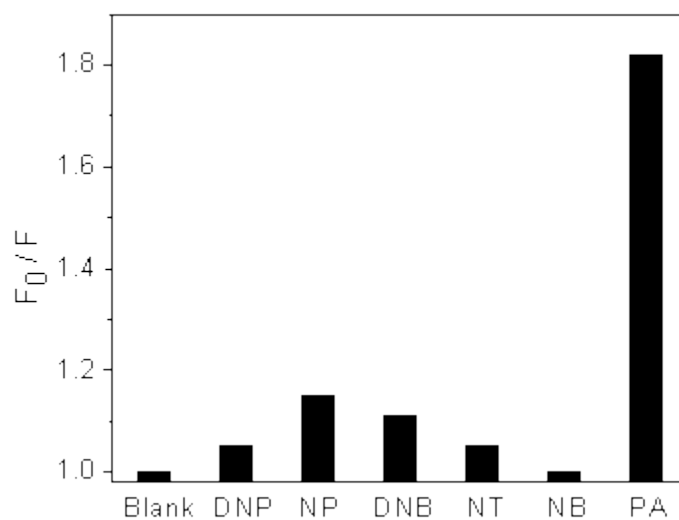

**ES37** Extent of fluorescence quenching of carbazoloisobenzotriazolophane 3b (1  $\mu$ M) observed at excitation wavelength [ $\lambda_{\text{ex}}$  = 405 nm] after the addition of 1mM of nitroaromatic compound in cyclohexane.
